# Supplementary material for: Correlation of tumor‐infiltrating immune cells of melanoma with overall survival by immunogenomic analysis
Source: PubMed Central journal article supplement (PMC7666744; doi:10.1002/cam4.3466), 2020-09-15
Supplement: CAM4-9-8444-s001.pdf [file CAM4-9-8444-s001.pdf]

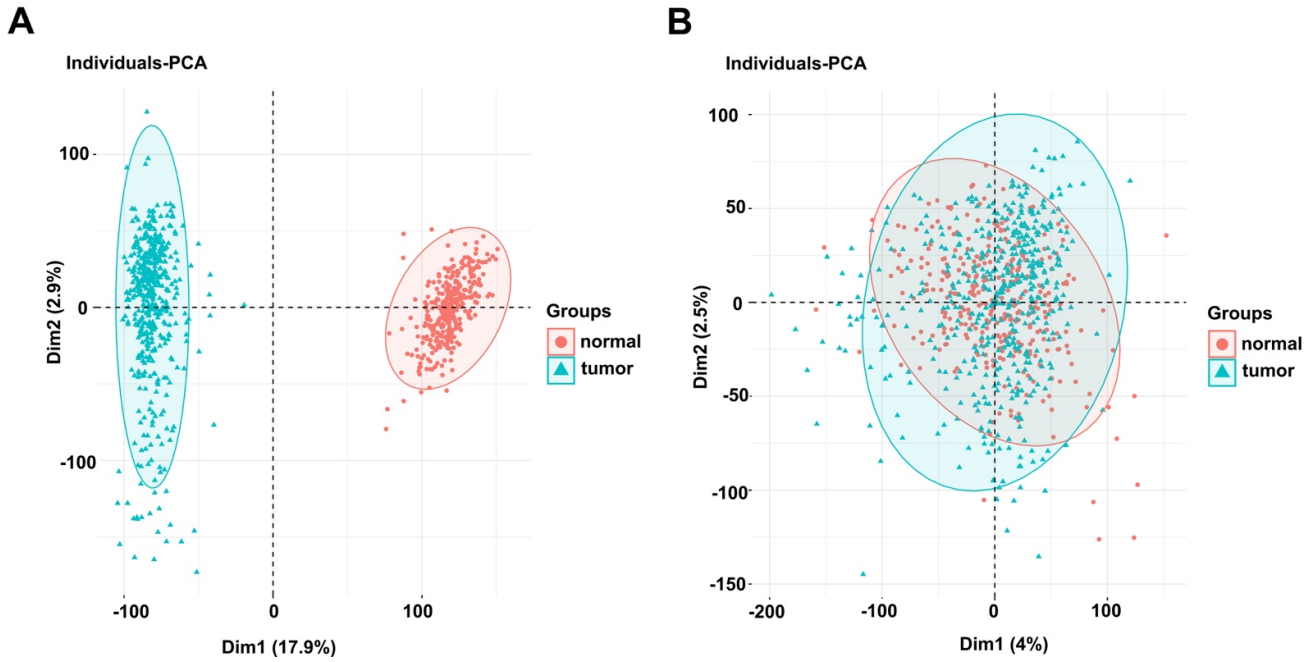

**FIGURE S1** Results of normalization by principal component analysis for TCGA-SKCM dataset.

Two boxplots of normal and tumor groups performed and visualized before (A) and after (B) batch effect removal.

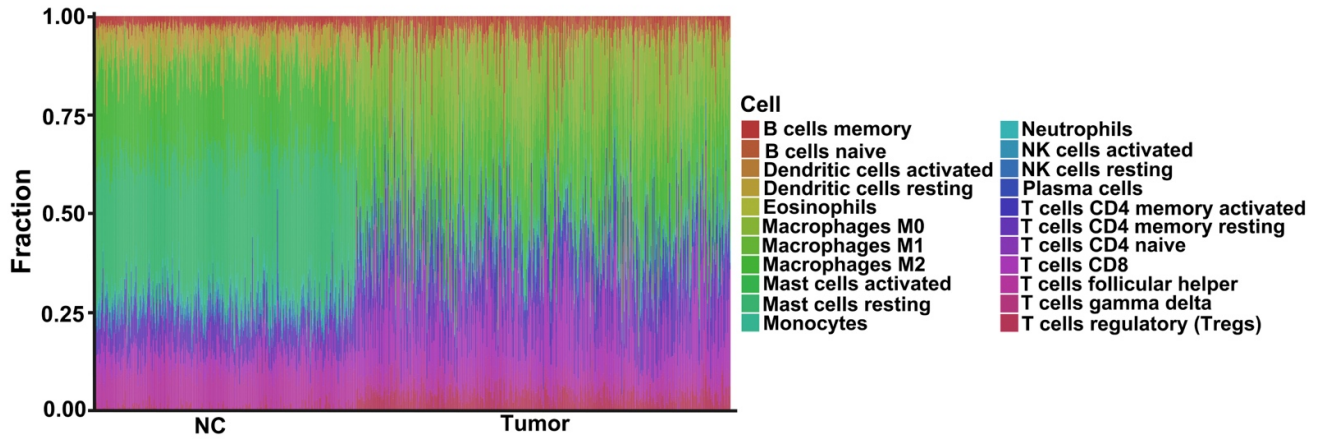

**FIGURE S2** Difference analysis of immune cells between melanoma and healthy tissues using the CIBERSORTx algorithm. Barplots of different fractions of 22 immune cells between melanoma patients and healthy tissues. NC represents healthy control, T represents Tumors.



**FIGURE S3** Heatmap of KEGG pathways identified by GSVA analysis in an individual sample. The blue boxplot represents healthy control; the red boxplot represents Tumors.
